# Supplementary material for: Marine reservoir ages for coastal West Africa
Source: Copernicus journal article supplement (doi:10.5194/gchron-2023-5), 2023-03-21
Supplement: Supplementary file [file gchron-2023-5-AC2-supplement.pdf]

## [Response to the Anonymous Reviewer's Comments](#)

### **Review on**

*Marine reservoir ages for coastal West Africa* by **G. Soulet et al.**

submitted to *Geochronology*,

Submission ID 10.5194/gchron-2023-5

**Date: April 12, 2023**

In this paper 30 new  $^{14}\text{C}$  ages of pre-bomb bivalves from coastal West Africa with known ages between 1850 and 1950 AD are presented and discussed. The case is made that since the derived marine reservoir ages (MRA) follow Marine20 (which itself is a carbon cycle based interpretation of IntCal20) that carbon cycle and climate are responsible for the observed trend and not local effects.

While I find the data of interest and certainly worth publishing I disagree with the final conclusion. Furthermore, I believe some careful revision is necessary to explain certain details of the draft more closely in order to make the work repeatable.

[We thank Anonymous Reviewer for her/his comments and especially regarding the first comment that corrects our section 3.3. Below is our response to each comment.](#)

[Note that “LXX” refers to lines in the revised manuscript with tracks. The revised manuscript will be checked for English by a native speaker.](#)

1. **Trend in MRA:** Stated in the abstract and conclusions, and more widely in section 3.3 it is said that the trend in measured MRA is similar to the modelled global trend in Marine20, and since this is based on simulations with a carbon cycle model, the trend in the new data should according to the authors also be based on carbon cycle change. Unfortunately, this is not the case. The trend in MRA in Marine20 between 1900 and 1950 AD is solely based on the decrease in IntCal20 (atmospheric  $\Delta^{14}\text{C}$ ), while Marine20 (global surface ocean  $\Delta^{14}\text{C}$ ) is constant. This is also seen in Figure 2. Furthermore, if one goes to details of the paper describing Marine20 (Heaton et al., 2020), Figure 7 contains model results in which  $\text{CO}_2$  and climate are kept constant. In these runs the calculated MRA changes similarly than in the full carbon cycle setup. This is not easily visible in this Figure 7b of the Marine20 paper, but one can check it by downloading the corresponding data from PANGAEA following the data link given in Heaton et al. (2020). I include a figure of these MRA in Marine20 (zoom-in of Figure 7b in (Heaton et al., 2020)) below. Thus, the sole reason for the observed trend in MRA in West Africa

seems to me to be the change in atmospheric  $\Delta^{14}\text{C}$ , which is also a global, and not a local, effect.

Many thanks for raising the point with a crystal-clear explanation. This is also related to one of Paula Reimer's comments. We will amend the main text and abstract accordingly to state that the observed trend in the MRA in West Africa is related to the change in the atmospheric  $\Delta^{14}\text{C}$  linked to fossil fuel burning. [Please, see L22, L534-538, L565.](#)

- 2. Symbols and units:** I find it rather confusing that the authors choose to label the radiocarbon age with  $^{14}\text{C}$ , whose units would be  $^{14}\text{C}$  years. Normally (in physics),  $^{14}\text{C}$  is the amount of radiocarbon with units "number of atoms" or "number of mol". Thus, I suggest to change this labelling. However, maybe this is also a community issues (data vs model), but it might help if the same symbols are used as in other papers, check, for example the symbols in the Marine20 paper (Heaton et al., 2020) or its recently published discussion on "how-to-use-Marine20" (Heaton et al., 2022). Also, if *time* is addressed it should always be stated if " $^{14}\text{C}$  years" or "calendar years" are meant, and using only "years" should be avoided in such a paper. One example, where this is missing is Table S1 in the SI, column M showing  $^{14}\text{C}$  age, units should be " $^{14}\text{C}$  yrs BP".

We followed the radiocarbon community conventions to report the radiocarbon ages ("BP", or " $^{14}\text{C}$  yrs BP") and the reservoir ages (" $^{14}\text{C}$  yrs"). Regarding the collection dates, it seemed very obvious to us that they are calendar ages, because they are related to the day/year when a physical person collected the sample: see <https://www.cambridge.org/core/journals/radiocarbon/information/author-instructions/preparing-your-materials>

[Modified accordingly the unit in column M of Table S1.](#)

- 3. Radiocarbon results (section 3.1):** I am not familiar with data reporting, maybe this detailed description is common, but my feeling is, this section is just a long version of Table S1. Indeed, some information of the text is missing in the Table and I suggest to include them there (museums label, collector). However, I have the feeling it would serve the paper better, if a condensed version of the Table appears in the main text instead of the long description and an extended version is still published as SI. But as I said, I am no expert here, so do as common in the community and ignore this comment if you feel it is rather strange.

Precisely because the information regarding the sample provenance and condition is generally omitted in publications, we have decided to provide as much as information possible in the main text of our paper. Moreover, we want that this long description including the numerical results appears in the main text, not in the supplement, because the information that appears in this section (3.1) is the most important. It is actually the

only one that is needed to repeat our work and recalculate the reservoir age values when the next updates of the calibration curves will be released.

If you keep the text, however, some changes are necessary: (a) the true measured value is  $F^{14}\text{C}$ , not  $^{14}\text{C}$  age. So I believe, that  $F^{14}\text{C}$  should be mentioned directly after the “radiocarbon laboratory number”; (b) the  $^{14}\text{C}$  age now appearing after the “radiocarbon laboratory number” comes without label of what it is and the units are wrong (units are “BP”, and should be “ $^{14}\text{C}$  yrs BP”).

We understand the above comments, however we did follow the conventions to report  $^{14}\text{C}$  dates as recommended in the journal *Radiocarbon*:

<https://www.cambridge.org/core/journals/radiocarbon/information/author-instructions/preparing-your-materials>

The radiocarbon lab ID of the sample is followed by the  $^{14}\text{C}$  date with the unit BP. Only the calibrated dates need “cal yrs BP”, calendar dates only need “AD” (in our case). We added the information (see e.g., L151, L398...)

**Calculated mean values:** At the beginning of section 3.2. it is not clear which 25 samples are averaged, since there should be 30 new samples and the SI table contains 38 samples. I believe what was done is averaging only the new (own) data without the outliers. However, this is not said so.

Right, in section 3.2, we averaged only our own set of data excluding the five outliers. In the revised manuscript, we will make the point clear in both the text and Table S1. The outliers are now clearly flagged in Table S1.

Outliers are discussed later, so I suggest to bring outliers first and only thereafter make average values without them.

We feel more appropriate to discuss first the non-outlier data before the outliers because an outlier can only be detected from a larger set of data. We hope our decision is acceptable for the Anonymous Reviewer.

The outliers are also not marked in the SI table, so it is not possible for me to reproduce the stated averaging without a lot of digging in the relevant section on outliers.

As stated above, we will make it easy for the reader to recalculate our averaging, clearly indicating the methodology and flagging outliers in Table S1.

Furthermore, you average samples with errors, for which to my knowledge a weighted mean is best used as done also in calculations of mean values from the marine radiocarbon reservoir database (<http://calib.org/marine/>)

See <http://calib.org/marine/AverageDeltaR.html> for details on errors. Even when weighted means are not taken (for which the reader might then want to be given an argument for this omission) it needs to state clearly on what the calculated error is based on. Is this only the error from the averaging or the mean error of the individual errors?

We thought the methodology was clear enough as we wrote, e.g. “an average of  $-77 \pm 47$   $^{14}\text{C}$  yrs 1sd,  $n = 25$ ),” which means we took the averaged value of 25 individual values (“ $n = 25$ ”), and that the reported error is the standard deviation of the averaged values (“1sd”). Nevertheless, we will alter the text to make the averaging methodology crystal clear, and comply to the recommended methodology described in the marine radiocarbon database: i) take the weighted mean by variance, ii) the reported uncertainty is the maximum of the Standard Deviation of  $\Delta R$  values and the weighted uncertainty in mean of  $\Delta R$  values. [Please, see L500-502.](#)

4. **Figure 2:** Here radiocarbon age (left y-axis for IntCal20 (green) and Marine20 (blue)) and MRA (right y-axis for Marine20 (black) and magenta data points) are mixed. I strongly suggest to split the figure in two to make it easier for the reader to see which axis needs to be used for which data sets.

Thanks. We modified our Figure 2 accordingly.

## References

- Heaton, T. J., Köhler, P., Butzin, M., Bard, E., Reimer, R. W., Austin, W. E. N., Ramsey, C. B., Grootes, P. M., Hughen, K. A., Kromer, B., Reimer, P. J., Adkins, J., Burke, A., Cook, M. S., Olsen, J., and Skinner, L. C.: Marine20 — the marine radiocarbon age calibration curve (0–55,000 cal BP), *Radiocarbon*, 62, 779–820, doi: 10.1017/RDC.2020.68, 2020.
- Heaton, T. J., Bard, E., Bronk Ramsey, C., Butzin, M., Hatté, C., Hughen, K. A., Köhler, P., and Reimer, P. J.: A response to community questions on the Marine20 radiocarbon age calibration curve: marine reservoir ages and the calibration of  $^{14}\text{C}$  samples from the oceans, *Radiocarbon*, pp. 1–27, doi:10.1017/RDC.2022.66, 2022.

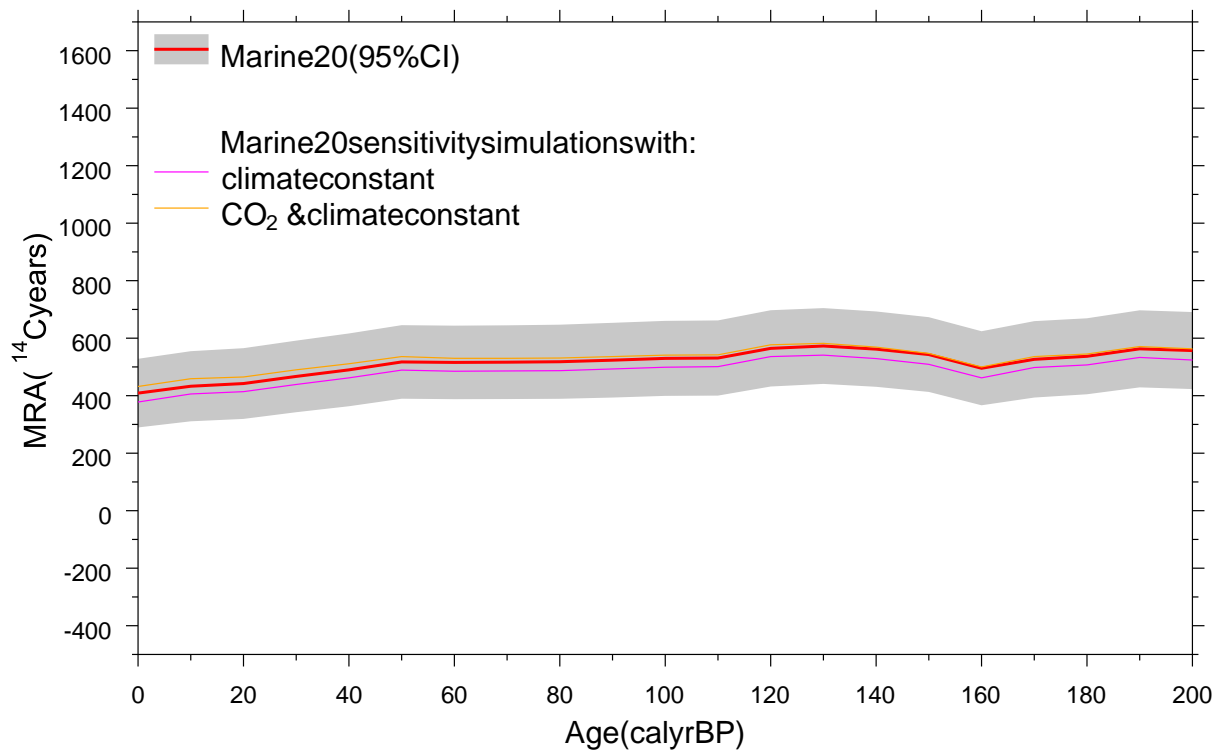

Figure 1: Zoom-in on Figure 7b of Heaton et al. (2020).
